# Supplementary material
Source: publisher figshare collection journal article supplement (https://frontiersin.figshare.com/ndownloader/files/17483321)
Supplement: Supplementary file 1 [file 17483321]

## Sheet: Data
BirdID	Sex	Type	Treatment	TimePeriod	Order	Temp	RH	BlinkRate_Min	BlinkDuration_S	TimeBlinking_Percent	SycnhronizedBlinking_Percent	CompositeFactor
F10	F	Y	Noise	Before	NF	21.1421	70.4243	47.5	0.0903399	7.04167	92.1944	-0.58259
F10	F	Y	Fan	Before	NF	21.3466	70.8691	47	0.0917498	7.18056	92.6944	-0.56001
F10	F	Y	Noise	During	NF	21.1779	70.8394	46	0.102604	7.76389	89.8084	-0.37635
F10	F	Y	Fan	During	NF	21.3809	71.7	80	0.10841	14.4444	90.8914	1.2697
F10	F	Y	Noise	After	NF	21.1979	70.8206	53.5	0.0677319	6.05556	97.1111	-0.84708
F10	F	Y	Fan	After	NF	21.4489	71.4799	65	0.0768262	8.29167	95.5833	-0.20175
F10	F	N	Noise	Before	NF	21.0599	65.3307	73.5	0.0918704	11.25	95.7222	0.53396
F10	F	N	Fan	Before	NF	21.3409	66.1169	72	0.0922037	11.0694	95.8611	0.4822
F10	F	N	Noise	During	NF	21.0992	65.585	71.5	0.106262	12.6528	94.9181	0.8351
F10	F	N	Fan	During	NF	21.3924	66.553	87	0.119061	17.2639	96.0289	1.89798
F10	F	N	Noise	After	NF	21.1357	65.7004	74.5	0.0928273	11.5278	95.4444	0.60192
F10	F	N	Fan	After	NF	21.4825	66.2054	80	0.0955319	12.7361	94.3056	0.90567
F11	F	Y	Noise	Before	FN	22.9875	68.3228	50.5	0.14078	11.9028	91.0278	0.69988
F11	F	Y	Fan	Before	FN	22.8267	68.2444	51.5	0.136977	11.7639	92.8056	0.65832
F11	F	Y	Noise	During	FN	22.9976	68.3158	54	0.13742	12.4861	89.9195	0.80647
F11	F	Y	Fan	During	FN	22.846	68.7145	91	0.171568	26.0556	90.6137	3.68834
F11	F	Y	Noise	After	FN	23.0104	68.3638	51.5	0.132449	11.3472	90.4167	0.55178
F11	F	Y	Fan	After	FN	22.8917	68.509	57	0.155144	14.7639	90.9722	1.3689
F11	F	N	Noise	Before	FN	20.9591	64.4852	49	0.125	10.2083	93.4722	0.26533
F11	F	N	Fan	Before	FN	20.6867	63.2379	53	0.118993	10.5139	94.1389	0.31732
F11	F	N	Noise	During	FN	20.9827	64.68	56	0.10874	10.1389	95.6123	0.21229
F11	F	N	Fan	During	FN	20.731	63.8675	95	0.118261	18.7361	92.4743	2.24592
F11	F	N	Noise	After	FN	21.0127	64.9469	51.5	0.11045	9.44444	93.7222	0.04828
F11	F	N	Fan	After	FN	20.7896	63.8391	55	0.124477	11.3056	93.8889	0.52646
F12	F	Y	Noise	Before	NF	21.165	63.4427	32.5	0.0924242	5	97.3889	-1.14374
F12	F	Y	Fan	Before	NF	21.2315	64.0115	31	0.0981183	5.06944	97.9167	-1.09772
F12	F	Y	Noise	During	NF	21.1764	63.8644	39.5	0.0979594	6.44444	97.6673	-0.74123
F12	F	Y	Fan	During	NF	21.2522	64.4274	60	0.127688	12.75	96.3899	0.85257
F12	F	Y	Noise	After	NF	21.1822	63.5783	41.5	0.0940767	6.51389	97.75	-0.73621
F12	F	Y	Fan	After	NF	21.288	64.0911	41.5	0.102639	7.02778	97.3889	-0.56666
F12	F	N	Noise	Before	NF	19.5777	66.7464	29.5	0.114828	5.63889	97.2222	-0.85236
F12	F	N	Fan	Before	NF	19.7943	66.9311	35.5	0.10527	6.20833	98.8611	-0.76843
F12	F	N	Noise	During	NF	19.6084	66.7881	52.5	0.098852	8.625	97.8617	-0.17242
F12	F	N	Fan	During	NF	19.8429	67.6433	70.5	0.126848	14.9028	96.8064	1.33763
F12	F	N	Noise	After	NF	19.6363	66.9512	39.5	0.093985	6.18056	98.0833	-0.82288
F12	F	N	Fan	After	NF	19.9323	67.3452	36	0.109188	6.54167	96.9167	-0.66774
F13	F	Y	Noise	Before	NF	21.7978	68.0565	37	0.076201	4.68056	98.0278	-1.28376
F13	F	Y	Fan	Before	NF	21.8914	68.1515	40	0.0875707	5.79167	94.9167	-0.93868
F13	F	Y	Noise	During	NF	21.8049	68.093	39	0.0803419	5.22222	97.4452	-1.12095
F13	F	Y	Fan	During	NF	21.9179	68.6536	68.5	0.126698	14.4722	96.0567	1.23888
F13	F	Y	Noise	After	NF	21.8178	68.1235	43	0.0797554	5.70833	97.6389	-0.9785
F13	F	Y	Fan	After	NF	21.9701	68.501	53	0.0898307	7.93056	97.6944	-0.35722
F13	F	N	Noise	Before	NF	21.323	68.9842	42	0.0973955	6.81944	98.5278	-0.64643
F13	F	N	Fan	Before	NF	21.4889	69.5128	40.5	0.0989469	6.68056	97.5	-0.67774
F13	F	N	Noise	During	NF	21.3373	68.9349	46	0.0885738	6.79167	98.8614	-0.66933
F13	F	N	Fan	During	NF	21.5282	69.8904	67.5	0.126178	14.2083	95.4735	1.17814
F13	F	N	Noise	After	NF	21.3602	68.9598	43	0.0934146	6.69444	98.5	-0.68865
F13	F	N	Fan	After	NF	21.6162	69.5744	56.5	0.0912069	8.59722	97.8611	-0.18025
F14	F	Y	Noise	Before	NF	23.6804	66.9728	52.5	0.112582	9.86111	96.6667	0.14747
F14	F	Y	Fan	Before	NF	23.7483	67.5132	51.5	0.125388	10.7222	94.3889	0.38851
F14	F	Y	Noise	During	NF	23.6883	67.034	52	0.123167	10.6528	93.1408	0.36363
F14	F	Y	Fan	During	NF	23.7748	67.8039	65.5	0.203762	22.2222	94.5571	3.05904
F14	F	Y	Noise	After	NF	23.6911	67.036	49.5	0.110272	9.09722	97.4722	-0.04111
F14	F	Y	Fan	After	NF	23.822	67.5252	59	0.133625	13.1389	97.1111	0.9506
F14	F	N	Noise	Before	NF	20.9777	65.4806	30	0.155324	7.25	93.9444	-0.13433
F14	F	N	Fan	Before	NF	21.1929	65.7705	32.5	0.156113	7.55556	92.0556	-0.03029
F14	F	N	Noise	During	NF	21.002	65.8551	58.5	0.100007	9.73611	95.6401	0.11183
F14	F	N	Fan	During	NF	21.2315	66.5102	73	0.151924	18.4722	96.3344	2.13308
F14	F	N	Noise	After	NF	21.0184	65.6974	47	0.115811	8.98611	96.1944	-0.04145
F14	F	N	Fan	After	NF	21.2994	66.215	40	0.149306	9.40278	92.1944	0.27276
F15	F	Y	Noise	Before	FN	22.9346	63.2602	59	0.076486	7.51389	97.3056	-0.43672
F15	F	Y	Fan	Before	FN	22.7702	63.3365	48	0.0771458	6.19444	96.9444	-0.83863
F15	F	Y	Noise	During	FN	22.9475	63.2338	46	0.0765169	5.86111	96.6676	-0.93219
F15	F	Y	Fan	During	FN	22.7959	63.6249	85.5	0.0856698	12.2222	97.6118	0.84778
F15	F	Y	Noise	After	FN	22.9618	63.217	59.5	0.0799953	7.93056	97.0833	-0.33155
F15	F	Y	Fan	After	FN	22.836	63.3339	63	0.0779176	8.15278	97.0278	-0.25062
F15	F	N	Noise	Before	FN	20.8861	64.3419	61	0.0797955	8.11111	98.6111	-0.27808
F15	F	N	Fan	Before	FN	20.6023	63.275	53.5	0.0780107	6.95833	97.5278	-0.61023
F15	F	N	Noise	During	FN	20.9176	64.7164	50	0.0743189	6.19444	98.1672	-0.82818
F15	F	N	Fan	During	FN	20.6409	64.0003	93	0.0886043	13.7361	98.3616	1.23675
F15	F	N	Noise	After	FN	20.9498	64.7275	53	0.0880876	7.77778	99.0556	-0.39735
F15	F	N	Fan	After	FN	20.7145	64.0668	54.5	0.0750758	6.81944	98.9722	-0.64068
F16	F	Y	Noise	Before	NF	20.1168	70.1089	48	0.101594	8.11111	94.8333	-0.30216
F16	F	Y	Fan	Before	NF	20.2641	71.1332	51	0.101787	8.625	94.6389	-0.16982
F16	F	Y	Noise	During	NF	20.1361	70.3955	52.5	0.0959422	8.38889	93.4463	-0.2372
F16	F	Y	Fan	During	NF	20.2948	71.8524	77	0.153463	19.6944	91.9467	2.38855
F16	F	Y	Noise	After	NF	20.1561	70.4396	48	0.0942792	7.54167	95.0278	-0.46221
F16	F	Y	Fan	After	NF	20.3556	71.7568	59	0.102241	10.0417	95.6389	0.18771
F16	F	N	Noise	Before	NF	21.3616	63.5317	65.5	0.0935406	10.2083	97.8056	0.24734
F16	F	N	Fan	Before	NF	21.5704	65.3488	65	0.088194	9.55556	98.5556	0.09112
F16	F	N	Noise	During	NF	21.3795	63.4028	65	0.0857692	9.29167	98.9725	0.02932
F16	F	N	Fan	During	NF	21.6076	64.3433	75	0.122401	15.3194	96.251	1.43421
F16	F	N	Noise	After	NF	21.4117	64.0769	66.5	0.0888443	9.84722	99.0278	0.16844
F16	F	N	Fan	After	NF	21.6748	64.9042	72.5	0.10931	13.2083	98.6389	0.96221
F17	F	Y	Noise	Before	FN	20.9112	67.9965	57	0.0731944	6.95833	97.1944	-0.59027
F17	F	Y	Fan	Before	FN	20.5344	68.458	57	0.0774374	7.34722	95.75	-0.49061
F17	F	Y	Noise	During	FN	20.9305	67.945	66	0.0726536	8.01389	95.2513	-0.26424
F17	F	Y	Fan	During	FN	20.5658	69.01	96	0.103385	16.5417	93.6962	1.823
F17	F	Y	Noise	After	FN	20.9455	67.947	60.5	0.0717105	7.25	95.0556	-0.49364
F17	F	Y	Fan	After	FN	20.6073	68.7224	35	0.0896786	5.23611	97.6389	-1.09307
F17	F	N	Noise	Before	FN	22.4348	66.8076	74.5	0.0943123	11.7083	95.5278	0.64198
F17	F	N	Fan	Before	FN	22.1195	67.1308	78	0.0921927	11.9861	95.5278	0.72885
F17	F	N	Noise	During	FN	22.4627	66.8337	81	0.079098	10.6528	95.8067	0.47574
F17	F	N	Fan	During	FN	22.1567	67.6853	106.5	0.0936208	16.625	95.6956	1.95259
F17	F	N	Noise	After	FN	22.4856	67.0981	59.5	0.090681	9	96.7222	-0.07007
F17	F	N	Fan	After	FN	22.2432	67.4409	66.5	0.0875584	9.69444	97.2222	0.13416
F18	F	Y	Noise	Before	NF	19.9831	77.0405	39	0.0872222	5.65278	96.0278	-0.98266
F18	F	Y	Fan	Before	NF	20.179	76.5104	38.5	0.0656813	4.22222	98.7778	-1.4369
F18	F	Y	Noise	During	NF	20.011	76.7758	36	0.0954223	5.81944	95.0292	-0.9282
F18	F	Y	Fan	During	NF	20.2226	77.6641	83	0.0995669	13.7778	96.3344	1.14873
F18	F	Y	Noise	After	NF	20.031	76.6267	40.5	0.0852315	5.72222	97.1111	-0.96507
F18	F	Y	Fan	After	NF	20.3206	77.4526	35.5	0.0843817	4.97222	97.5556	-1.17999
F18	F	N	Noise	Before	NF	22.773	60.3979	52	0.0878468	7.61111	98.2222	-0.44318
F18	F	N	Fan	Before	NF	22.9818	61.9229	29.5	0.109313	5.38889	96.7222	-0.95212
F18	F	N	Noise	During	NF	22.7988	60.6359	49.5	0.0823836	6.79167	97.4729	-0.66696
F18	F	N	Fan	During	NF	23.024	61.9969	94.5	0.118995	18.7361	96.0289	2.24366
F18	F	N	Noise	After	NF	22.8224	60.8661	49.5	0.0932551	7.69444	97.4444	-0.42253
F18	F	N	Fan	After	NF	23.0984	61.9255	49	0.108181	8.83333	97.1667	-0.11032
F19	F	Y	Noise	Before	FN	23.2678	58.1578	52	0.0772407	6.68056	98.4722	-0.68746
F19	F	Y	Fan	Before	FN	23.1062	59.489	47	0.0644167	5.01389	97.4167	-1.16256
F19	F	Y	Noise	During	FN	23.2743	58.3925	40	0.0679167	4.52778	95.4457	-1.33768
F19	F	Y	Fan	During	FN	23.1213	59.6701	82	0.0803423	10.9722	96.9453	0.55223
F19	F	Y	Noise	After	FN	23.2878	58.4741	42	0.0647502	4.51389	97.5833	-1.33319
F19	F	Y	Fan	After	FN	23.1534	58.7667	57	0.063571	6.04167	97.4167	-0.82034
F19	F	N	Noise	Before	FN	21.5554	66.1653	45.5	0.102354	7.73611	96.6389	-0.39446
F19	F	N	Fan	Before	FN	21.2215	66.132	45.5	0.111087	8.43056	97.1389	-0.20168
F19	F	N	Noise	During	FN	21.5847	66.4227	57	0.0809942	7.69444	98.3893	-0.40459
F19	F	N	Fan	During	FN	21.2651	66.8703	76	0.093785	11.875	97.0286	0.68964
F19	F	N	Noise	After	FN	21.6133	66.1361	53	0.0907348	8.01389	98.6944	-0.33593
F19	F	N	Fan	After	FN	21.3473	66.6574	63.5	0.0844396	8.93056	98.1944	-0.06478
F20	F	Y	Noise	Before	FN	21.4581	70.778	43.5	0.0871055	6.30556	96.1111	-0.80311
F20	F	Y	Fan	Before	FN	21.2343	70.2508	41.5	0.0789967	5.45833	96.0278	-1.05234
F20	F	Y	Noise	During	FN	21.4789	70.872	44	0.0944214	6.91667	94.5015	-0.62653
F20	F	Y	Fan	During	FN	21.2651	70.5363	94	0.123626	19.3611	96.501	2.36414
F20	F	Y	Noise	After	FN	21.5025	70.8691	41.5	0.0901661	6.22222	96.0556	-0.82028
F20	F	Y	Fan	After	FN	21.3223	70.4248	44	0.0844444	6.16667	97.1111	-0.84171
F20	F	N	Noise	Before	FN	20.8511	66.9485	33	0.129657	7.125	97.25	-0.40761
F20	F	N	Fan	Before	FN	20.5665	67.1332	23.5	0.152853	5.97222	94.9444	-0.46651
F20	F	N	Noise	During	FN	20.884	67.424	45	0.0962054	7.20833	94.6126	-0.54637
F20	F	N	Fan	During	FN	20.6044	67.6902	78	0.192807	25.1389	89.975	3.55025
F20	F	N	Noise	After	FN	20.9226	67.1903	31.5	0.151613	7.95833	95.3889	-0.06431
F20	F	N	Fan	After	FN	20.6659	67.4559	32	0.155148	8.125	93.3889	0.01205
F21	F	Y	Noise	Before	NF	19.775	69.0413	37	0.0758163	4.66667	97.1667	-1.29031
F21	F	Y	Fan	Before	NF	19.8544	68.04	64	0.0819312	8.73611	96.6111	-0.10791
F21	F	Y	Noise	During	NF	19.785	69.3274	43	0.0757752	5.43056	96.1122	-1.06185
F21	F	Y	Fan	During	NF	19.8816	68.388	73	0.130002	15.8194	94.3071	1.54317
F21	F	Y	Noise	After	NF	19.7958	68.5903	35	0.0743736	4.33333	97.75	-1.39428
F21	F	Y	Fan	After	NF	19.9209	68.2902	8	0.0933862	1.25	99.4444	-2.13997
F21	F	N	Noise	Before	NF	22.5972	66.3333	56	0.0810575	7.55556	98.3889	-0.4433
F21	F	N	Fan	Before	NF	22.8224	66.8292	59	0.087749	8.625	97.0833	-0.16298
F21	F	N	Noise	During	NF	22.6258	66.476	57.5	0.0813763	7.80556	97.0286	-0.37509
F21	F	N	Fan	During	NF	22.8739	67.2616	82	0.108775	14.875	96.8064	1.3712
F21	F	N	Noise	After	NF	22.6508	66.6293	51.5	0.0841283	7.22222	98.4444	-0.54779
F21	F	N	Fan	After	NF	22.9568	66.938	61.5	0.106059	10.8611	98.2222	0.39042
F22	F	Y	Noise	Before	NF	23.591	63.8082	50	0.0923064	7.70833	93.9167	-0.42139
F22	F	Y	Fan	Before	NF	23.7876	63.7062	42	0.108645	7.625	91.7222	-0.40848
F22	F	Y	Noise	During	NF	23.6075	63.9035	51	0.0940546	8.02778	92.7242	-0.33845
F22	F	Y	Fan	During	NF	23.8105	63.7924	81	0.124691	16.8333	95.529	1.77994
F22	F	Y	Noise	After	NF	23.6189	63.969	46.5	0.0995787	7.73611	93.9167	-0.40667
F22	F	Y	Fan	After	NF	23.8606	63.3497	53.5	0.110066	9.81944	93.6111	0.13372
F22	F	N	Noise	Before	NF	22.5879	72.0443	75	0.0845531	10.5694	96.3611	0.39593
F22	F	N	Fan	Before	NF	22.8982	73.2497	74.5	0.105206	13.0556	96.9444	0.9385
F22	F	N	Noise	During	NF	22.6336	72.0536	79.5	0.0838415	11.1111	95.3902	0.55491
F22	F	N	Fan	During	NF	22.9332	71.9772	96.5	0.0983047	15.8056	95.9456	1.6838
F22	F	N	Noise	After	NF	22.693	72.1088	70.5	0.0895842	10.5278	95.3889	0.35053
F22	F	N	Fan	After	NF	23.0426	71.2251	80	0.0844564	11.2639	96.9167	0.59226
F23	F	Y	Noise	Before	FN	21.1743	65.7574	59.5	0.0852127	8.41667	97.3889	-0.20808
F23	F	Y	Fan	Before	FN	20.9634	65.6016	60	0.0823415	8.22222	97.3889	-0.25585
F23	F	Y	Noise	During	FN	21.1893	66.0646	61	0.0843601	8.55556	96.3344	-0.16782
F23	F	Y	Fan	During	FN	20.9963	66.3865	78	0.122009	15.8611	96.5565	1.5623
F23	F	Y	Noise	After	FN	21.2079	66.0661	58	0.0840452	8.06944	96.4167	-0.29849
F23	F	Y	Fan	After	FN	21.0613	66.1873	67.5	0.0903052	10.1528	97.9722	0.24608
F23	F	N	Noise	Before	FN	18.2385	72.1482	53	0.0940527	8.31944	98.0278	-0.25783
F23	F	N	Fan	Before	FN	17.9982	71.6261	57.5	0.0929404	8.91667	97.7222	-0.0975
F23	F	N	Noise	During	FN	18.2606	72.1374	63.5	0.094616	10.0139	97.1397	0.19179
F23	F	N	Fan	During	FN	18.0197	72.6833	83	0.1001	13.8472	97.3618	1.16366
F23	F	N	Noise	After	FN	18.2807	72.1517	60.5	0.0916075	9.23611	99.4167	-0.00736
F23	F	N	Fan	After	FN	18.0776	72.5522	67.5	0.0933586	10.5	98.2778	0.32565
F24	F	Y	Noise	Before	FN	23.1205	70.8621	54	0.0997399	8.98611	93.8611	-0.08397
F24	F	Y	Fan	Before	FN	23.0097	71.1638	50	0.0985443	8.19444	97.0556	-0.28485
F24	F	Y	Noise	During	FN	23.1356	70.9195	52	0.0965213	8.375	93.6962	-0.24307
F24	F	Y	Fan	During	FN	23.019	71.5337	68.5	0.117032	13.4306	91.8078	0.99369
F24	F	Y	Noise	After	FN	23.1506	70.916	52.5	0.0904503	7.91667	96.1667	-0.36257
F24	F	Y	Fan	After	FN	23.0505	71.397	57	0.0884129	8.38889	96.8889	-0.22865
F24	F	N	Noise	Before	FN	21.4653	64.0901	67.5	0.114159	12.8333	97.25	0.86397
F24	F	N	Fan	Before	FN	21.1157	63.6727	62	0.0912516	9.41667	98.3333	0.04412
F24	F	N	Noise	During	FN	21.4853	64.1555	71	0.081452	9.63889	98.7226	0.15446
F24	F	N	Fan	During	FN	21.1471	64.0055	87.5	0.120211	17.5278	97.3896	1.95512
F24	F	N	Noise	After	FN	21.5218	64.3176	58	0.101868	9.84722	98.9167	0.13694
F24	F	N	Fan	After	FN	21.2108	63.8741	58.5	0.0947277	9.23611	99.3056	-0.01405
F27	F	Y	Noise	Before	NF	21.2394	75.8266	30.5	0.120617	6.08333	92.8889	-0.7031
F27	F	Y	Fan	Before	NF	21.4245	75.7809	32	0.11901	6.34722	93.5278	-0.65793
F27	F	Y	Noise	During	NF	21.2565	75.6467	33.5	0.12256	6.84722	93.1408	-0.51921
F27	F	Y	Fan	During	NF	21.4789	76.7277	54.5	0.154672	14.0556	93.113	1.22198
F27	F	Y	Noise	After	NF	21.2758	75.7085	29	0.117241	5.66667	96.4444	-0.82988
F27	F	Y	Fan	After	NF	21.5661	76.3119	42.5	0.120049	8.5	96.0556	-0.1488
F27	F	N	Noise	Before	NF	22.3412	70.9868	44	0.102841	7.54167	98.1389	-0.44587
F27	F	N	Fan	Before	NF	22.5929	70.6096	43.5	0.106774	7.73611	98.25	-0.3845
F27	F	N	Noise	During	NF	22.3719	71.0288	44.5	0.0920753	6.83333	98.7226	-0.65463
F27	F	N	Fan	During	NF	22.6401	71.4725	63	0.110979	11.6528	97.8617	0.58068
F27	F	N	Noise	After	NF	22.4113	70.9997	42.5	0.103871	7.36111	98.2222	-0.48871
F27	F	N	Fan	After	NF	22.7366	71.0509	50	0.10841	9.02778	98.2222	-0.06139
F28	F	Y	Noise	Before	FN	18.2142	74.2594	44.5	0.104036	7.66667	95.6667	-0.40434
F28	F	Y	Fan	Before	FN	17.9153	74.5598	43.5	0.0945516	6.86111	95.2778	-0.643
F28	F	Y	Noise	During	FN	18.2456	74.4373	47.5	0.114559	9.06944	94.3071	-0.0361
F28	F	Y	Fan	During	FN	17.9639	75.3582	79	0.124789	16.4306	94.9736	1.6876
F28	F	Y	Noise	After	FN	18.2699	74.1289	50	0.0996667	8.30556	96.6111	-0.25753
F28	F	Y	Fan	After	FN	18.0433	75.0339	41.5	0.0884098	6.11111	98.5	-0.85572
F28	F	N	Noise	Before	FN	21.2958	66.8867	46.5	0.0935683	7.25	97.7778	-0.54029
F28	F	N	Fan	Before	FN	21.0692	66.7456	49	0.100181	8.16667	96.7222	-0.29046
F28	F	N	Noise	During	FN	21.3273	67.258	53	0.0887738	7.84722	98.5282	-0.38047
F28	F	N	Fan	During	FN	21.1042	65.8802	86.5	0.10816	15.5972	95.8067	1.55246
F28	F	N	Noise	After	FN	21.3645	67.6793	39.5	0.113926	7.5	96.7778	-0.41373
F28	F	N	Fan	After	FN	21.1621	65.8252	58.5	0.0988847	9.63889	97	0.08612
F29	F	Y	Noise	Before	FN	17.1181	72.1881	41.5	0.0791957	5.47222	98	-1.04818
F29	F	Y	Fan	Before	FN	16.9236	71.6157	42	0.0813492	5.69444	97.5	-0.98303
F29	F	Y	Noise	During	FN	17.1302	72.3343	44.5	0.0799285	5.93056	98.1394	-0.9154
F29	F	Y	Fan	During	FN	16.9493	72.9598	71	0.118581	14.0278	97.3341	1.14145
F29	F	Y	Noise	After	FN	17.1617	72.449	41	0.0849086	5.79167	96.4167	-0.94945
F29	F	Y	Fan	After	FN	17.0094	72.9312	44	0.0869318	6.375	97.4722	-0.78557
F29	F	N	Noise	Before	FN	21.2093	67.975	34	0.0828427	4.69444	98.8889	-1.26707
F29	F	N	Fan	Before	FN	20.9898	67.5958	34.5	0.0729202	4.19444	98.3889	-1.44074
F29	F	N	Noise	During	FN	21.2386	68.052	42.5	0.0790835	5.59722	98.1394	-1.01172
F29	F	N	Fan	During	FN	21.0113	68.3402	70	0.0970792	11.3194	97.1952	0.52712
F29	F	N	Noise	After	FN	21.2622	68.1629	33	0.0825758	4.54167	98.4722	-1.31162
F29	F	N	Fan	After	FN	21.0685	68.0325	45.5	0.0814755	6.13889	97.3333	-0.84798
F6	F	Y	Noise	Before	FN	19.0078	72.7401	48.5	0.127333	10.3611	91.6667	0.30135
F6	F	Y	Fan	Before	FN	18.7461	72.8727	46.5	0.117868	9.26389	92.6944	0.00561
F6	F	Y	Noise	During	FN	19.0278	72.7465	51	0.130021	11.2778	90.1694	0.50092
F6	F	Y	Fan	During	FN	18.7762	73.0804	63.5	0.153479	16.3056	91.8911	1.67888
F6	F	Y	Noise	After	FN	19.055	72.8585	47	0.132502	10.5	90.7222	0.34874
F6	F	Y	Fan	After	FN	18.8398	73.0873	57	0.108918	10.3472	94.25	0.26218
F6	F	N	Noise	Before	FN	21.782	63.1642	57.5	0.121096	11.5833	95.9444	0.57385
F6	F	N	Fan	Before	FN	21.4925	62.4423	64	0.121814	12.9167	94.9444	0.89007
F6	F	N	Noise	During	FN	21.8078	63.1809	60	0.116919	11.6806	98.1949	0.59001
F6	F	N	Fan	During	FN	21.5425	62.6537	101	0.127145	21.4028	97.0286	2.81045
F6	F	N	Noise	After	FN	21.845	63.4137	53.5	0.12921	11.5278	97.6111	0.57799
F6	F	N	Fan	After	FN	21.6205	62.5967	66	0.139346	15.3056	95.9444	1.43965
F9	F	Y	Noise	Before	NF	21.8078	66.6705	65	0.100168	10.8194	95.1944	0.39177
F9	F	Y	Fan	Before	NF	22.1288	67.7459	51.5	0.116901	10.0278	95.8611	0.19888
F9	F	Y	Noise	During	NF	21.8192	66.7052	59	0.106906	10.4861	95.0014	0.29925
F9	F	Y	Fan	During	NF	22.166	68.4719	152	0.153708	39.0139	89.1419	6.39279
F9	F	Y	Noise	After	NF	21.8457	66.7524	64	0.101042	10.7778	96.0556	0.37477
F9	F	Y	Fan	After	NF	22.2475	68.2019	58	0.125144	12.0972	94.8889	0.69725
F9	F	N	Noise	Before	NF	19.3775	79.5344	29	0.117095	5.65278	97.1944	-0.83337
F9	F	N	Fan	Before	NF	19.612	78.374	23.5	0.132299	5.18056	97.4167	-0.82199
F9	F	N	Noise	During	NF	19.3968	79.1951	34.5	0.102462	5.875	97.6395	-0.86656
F9	F	N	Fan	During	NF	19.6549	79.7805	61.5	0.141393	14.5	93.5573	1.26702
F9	F	N	Noise	After	NF	19.4282	79.1677	36	0.118563	7.09722	97.6944	-0.48294
F9	F	N	Fan	After	NF	19.7464	79.8033	26	0.161617	6.98611	94.4167	-0.1778
M10	M	Y	Noise	Before	NF	20.8633	92.5665	36	0.133229	7.93056	93.5556	-0.198
M10	M	Y	Fan	Before	NF	21.1085	91.3233	34.5	0.136716	7.86111	91.6389	-0.19644
M10	M	Y	Noise	During	NF	20.8919	91.9773	37	0.116348	7.23611	94.446	-0.47179
M10	M	Y	Fan	During	NF	21.1714	92.6166	71.5	0.144283	17.2222	90.9192	1.85456
M10	M	Y	Noise	After	NF	20.9212	91.9283	36	0.123457	7.27778	93.5	-0.39923
M10	M	Y	Fan	After	NF	21.2873	92.9504	43.5	0.139559	10.1389	94.0556	0.31538
M10	M	N	Noise	Before	NF	19.2688	67.0264	38.5	0.161468	10.1806	89.5278	0.48418
M10	M	N	Fan	Before	NF	19.429	68.203	20.5	0.159232	5.5	95	-0.50984
M10	M	N	Noise	During	NF	19.2845	67.2075	46	0.106937	8.19444	95.1125	-0.27069
M10	M	N	Fan	During	NF	19.464	68.9308	83	0.118019	16.3194	94.5848	1.68126
M10	M	N	Noise	After	NF	19.3031	67.3232	41.5	0.151217	10.3472	95.4722	0.4423
M10	M	N	Fan	After	NF	19.5298	68.8147	55.5	0.11817	10.9028	96.1389	0.41042
M11	M	Y	Noise	Before	FN	20.4843	66.9351	36.5	0.085005	5.125	97.7778	-1.13088
M11	M	Y	Fan	Before	FN	20.1518	66.374	25.5	0.0946795	4.02778	96.9444	-1.39145
M11	M	Y	Noise	During	FN	20.5086	67.3693	32	0.0918622	4.875	96.5287	-1.17717
M11	M	Y	Fan	During	FN	20.1869	66.5986	56	0.115105	10.7778	91.3357	0.36826
M11	M	Y	Noise	After	FN	20.5422	67.442	31.5	0.0865675	4.55556	96.3889	-1.29387
M11	M	Y	Fan	After	FN	20.2534	66.4459	32.5	0.0833175	4.52778	97.8333	-1.3154
M11	M	N	Noise	Before	FN	22.4105	78.7384	26.5	0.119947	5.30556	95.1111	-0.89563
M11	M	N	Fan	Before	FN	22.1524	80.0689	31.5	0.0937374	4.91667	96.6667	-1.15996
M11	M	N	Noise	During	FN	22.4377	78.8109	37.5	0.101959	6.375	96.9175	-0.74476
M11	M	N	Fan	During	FN	22.1982	81.3241	60	0.101534	10.1528	95.8623	0.21493
M11	M	N	Noise	After	FN	22.4613	78.3181	27	0.114506	5.15278	97.3611	-0.97145
M11	M	N	Fan	After	FN	22.2704	80.4521	33	0.104305	5.72222	97.2778	-0.89577
M7	M	Y	Noise	Before	NF	20.0188	67.778	38	0.0867117	5.48611	95.6944	-1.03195
M7	M	Y	Fan	Before	NF	20.2076	68.1919	39	0.0776535	5.04167	96.0278	-1.17642
M7	M	Y	Noise	During	NF	20.0503	67.799	39.5	0.085844	5.65278	95.0292	-0.98865
M7	M	Y	Fan	During	NF	20.2462	68.851	65	0.109844	12	93.0019	0.65327
M7	M	Y	Noise	After	NF	20.0739	68.057	39.5	0.0815461	5.34722	96.1389	-1.0793
M7	M	Y	Fan	After	NF	20.307	68.7828	41.5	0.085407	5.91667	95.5556	-0.91683
M7	M	N	Noise	Before	NF	23.2149	78.4864	41.5	0.0829457	5.73611	96.5278	-0.9694
M7	M	N	Fan	Before	NF	23.4866	77.8335	33.5	0.0987674	5.38889	95.8889	-0.99386
M7	M	N	Noise	During	NF	23.2278	78.6111	45	0.0871776	6.54167	96.6954	-0.73968
M7	M	N	Fan	During	NF	23.5238	78.5533	64	0.115852	12.3611	96.6676	0.74897
M7	M	N	Noise	After	NF	23.2457	78.4057	39.5	0.0878754	5.77778	95.2778	-0.94806
M7	M	N	Fan	After	NF	23.6096	78.136	40.5	0.0983364	6.63889	96.8333	-0.69041
M8	M	Y	Noise	Before	FN	19.9316	67.463	38	0.0919439	5.81944	94.25	-0.9261
M8	M	Y	Fan	Before	FN	19.4447	65.1455	46	0.0996377	7.63889	95.2222	-0.42891
M8	M	Y	Noise	During	FN	19.9609	67.3418	40	0.0946842	6.30556	95.779	-0.7877
M8	M	Y	Fan	During	FN	19.4862	65.7054	85	0.100549	14.25	94.5571	1.263
M8	M	Y	Noise	After	FN	20.0103	67.5011	34.5	0.102715	5.91667	95.6667	-0.85847
M8	M	Y	Fan	After	FN	19.5462	65.5088	44	0.102287	7.48611	97.5833	-0.45944
M8	M	N	Noise	Before	FN	20.9734	77.709	45	0.0949687	7.125	98.3611	-0.57192
M8	M	N	Fan	Before	FN	20.6395	78.9797	55	0.0888283	8.13889	97.5556	-0.29912
M8	M	N	Noise	During	FN	21.0005	77.5264	56	0.0937905	8.75	96.8342	-0.14103
M8	M	N	Fan	During	FN	20.6881	80.7207	79.5	0.0911364	12.0694	95.3902	0.76002
M8	M	N	Noise	After	FN	21.0306	77.5082	47.5	0.110007	8.70833	96.6944	-0.13649
M8	M	N	Fan	After	FN	20.7725	79.7108	41	0.110317	7.54167	97.7778	-0.4201
M9	M	Y	Noise	Before	FN	19.1744	81.7516	91	0.107768	16.3333	94.1111	1.73821
M9	M	Y	Fan	Before	FN	18.9063	81.2772	51	0.104167	8.875	95.4722	-0.11021
M9	M	Y	Noise	During	FN	19.1987	81.8143	84.5	0.108003	15.2083	96.1955	1.45848
M9	M	Y	Fan	During	FN	18.9435	81.7725	79	0.106007	13.9583	94.1405	1.15894
M9	M	Y	Noise	After	FN	19.228	81.8129	47	0.110594	8.66667	94.0556	-0.14548
M9	M	Y	Fan	After	FN	19.0114	82.0796	55.5	0.106475	9.84722	94.0278	0.13762
M9	M	N	Noise	Before	FN	19.3446	69.6101	47	0.0996454	7.80556	94.1667	-0.38606
M9	M	N	Fan	Before	FN	19.0829	69.0176	27.5	0.111391	5.01389	95.6944	-1.01586
M9	M	N	Noise	During	FN	19.3696	69.4287	56	0.10016	9.33333	94.6126	0.00852
M9	M	N	Fan	During	FN	19.1144	69.8457	68.5	0.10231	11.6806	94.5293	0.6012
M9	M	N	Noise	After	FN	19.4054	69.6286	45.5	0.0989775	7.5	95.8889	-0.46521
M9	M	N	Fan	After	FN	19.1773	69.5518	56	0.0976149	9.09722	95.8056	-0.05158

## Sheet: Info
BirdID	Identity of the bird
Sex	Sex of the bird
Type	Head-restrained trial (Y) or head-unrestrained trial (N)
Treatment	Wind treatment (fan) or control (noise)
TimePeriod	Before, during, or after the fan or noise turned on
Order	Whether the fan turned on first (FN) or noise turned on first (NF)
Temp	Temperature (degrees Celsius)
RH	Relative humidity (percent)
BlinkRate_Min	Blink rate (blinks/minute)
BlinkDuration_S	Blink duration (s)
TimeBlinking_Percent	Time spent blinking (percent)
SycnhronizedBlinking_Percent	Sychnorzined blinks (percent)
CompositeFactor	Composite factor of the blink rate, blink duration, and time spent blinking
